# Supplementary material
Source: PubMed Central journal article supplement (PMC5744058)
Supplement: ba001313-supp1.pdf [file ba001313-supp1.pdf]

**Supplemental Table 1. Blood counts of alive patients at last follow-up**

|                                       | <b>Patient 3</b> | <b>Patient 4</b> | <b>Patient 7</b> | <b>Patient 8</b> |
|---------------------------------------|------------------|------------------|------------------|------------------|
| <b>Age at last evaluation</b>         | 9 years old      | 8 years old      | 5 years old      | 19 years old     |
| <b>Blood count at last evaluation</b> |                  |                  |                  |                  |
| Total WBC (G/L)                       | 2.1              | 1.7              | 2.4              | 3.01             |
| PNN (G/L)                             | 1.0              | 0.5              | 1.2              | 1.99             |
| Lymphocytes (G/L)                     | 0.9              | 1.0              | 0.9              | 0.81             |
| Hemoglobin (g/dL)                     | 5.6              | 4.8              | 10.1             | 11.1             |
| Reticulocytes (G/L)                   | 18.2             | NA               | 45               | 57               |
| Platelets (G/L)                       | 11               | 3                | 172              | 30               |

| <b>Normal Values</b> | <b>6 months - 6 years</b> | <b>After 6 years</b> |
|----------------------|---------------------------|----------------------|
| Total WBC            | 6-17.5                    | 04-10                |
| PNN                  | 1.5-8.5                   | 1.5-7                |
| Lymphocytes          | 3-9.5                     | 1.5-4                |
| Hemoglobin (g/dL)    | 10.5-12                   | 12-17                |
| Reticulocytes (G/L)  | 25- 90                    | 25- 90               |
| Platelets (G/L)      | 150-450                   | 150-450              |
